# Supplementary material for: Plasma metabolomic signatures from patients following high-dose total body irradiation
Source: Royal Society of Chemistry journal article supplement (doi:10.1039/d2mo00274d), 2023-03-28
Supplement: d2mo00274d1.pdf [file d2mo00274d1.pdf]

**Table S1.** Clinical characteristics of each patient included in this study

| Patient | Sex    | Age | Diagnosis |
|---------|--------|-----|-----------|
| TBI-1   | Male   | 23  | CML       |
| TBI-2   | Male   | 21  | ALL       |
| TBI-5   | Female | 42  | ALL       |
| TBI-6   | Male   | 29  | NHL       |
| TBI-7   | Male   | 28  | ALL       |
| TBI-8   | Male   | 21  | AML       |
| TBI-9   | Male   | 22  | ALL       |
| TBI-10  | Male   | 36  | ALL       |
| TBI-11  | Female | 22  | ALL       |
| TBI-12  | Male   | 34  | ALL       |
| TBI-13  | Male   | 40  | NHL       |
| TBI-14  | Male   | 17  | ALL       |
| TBI-15  | Female | 28  | NHL       |
| TBI-16  | Female | 31  | AML       |
| TBI-17  | Male   | 49  | NHL       |
| TBI-18  | Female | 32  | ALL       |
| TBI-19  | Female | 17  | AML       |
| TBI-20  | Male   | 47  | AML       |
| TBI-21  | Male   | 27  | AML       |
| TBI-22  | Male   | 46  | NHL       |
| TBI-23  | Male   | 20  | NHL       |
| TBI-24  | Male   | 33  | NHL       |
| TBI-25  | Male   | 51  | ALL       |
| TBI-26  | Male   | 14  | ALL       |
| TBI-27  | Male   | 39  | NHL       |
| TBI-28  | Female | 34  | AML       |
| TBI-29  | Male   | 33  | CML       |
| TBI-30  | Male   | 13  | ALL       |
| TBI-31  | Male   | 32  | ALL       |
| TBI-32  | Male   | 37  | ALL       |
| TBI-33  | Female | 33  | AML       |
| TBI-34  | Male   | 40  | NHL       |
| TBI-35  | Male   | 35  | AML       |
| TBI-36  | Male   | 21  | ALL       |
| TBI-37  | Male   | 10  | AML       |
| TBI-38  | Male   | 15  | ALL       |

**Table S2.** The statistical information of significantly differential metabolites based on pseudotargeted GC–MS method

| Metabolites                      | Rt (min) | Peak Ion (m/z) | Pre-TBI       | After-TBI       | p value  | FDR      | Female   |             | Male     |             |
|----------------------------------|----------|----------------|---------------|-----------------|----------|----------|----------|-------------|----------|-------------|
|                                  |          |                |               |                 |          |          | p value  | Fold Change | p value  | Fold change |
| Lactate <sup>a</sup>             | 7.85     | 219            | 753.92±272.92 | 525.32±252.22   | 0.000137 | 0.00038  | 0.10938  | 0.7         | 0.001555 | 0.7         |
| Glycolate <sup>a</sup>           | 8.32     | 66             | 0.19±0.07     | 0.14±0.03       | 0.000172 | 0.000427 | 0.3125   | 0.9         | 0.000342 | 0.8         |
| Valine <sup>a</sup>              | 8.66     | 72             | 23.16±12.71   | 39.89±30.12     | 0.00051  | 0.000976 | 0.38281  | 1.1         | 0.000473 | 1.7         |
| Acetoacetate <sup>a</sup>        | 9.45     | 89             | 0.54±0.60     | 1.62±3.33       | 0.016004 | 0.017006 | 0.64063  | 1.1         | 0.015633 | 2.4         |
| 3-hydroxybutyric acid (Hyb)      | 10.72    | 147            | 32.56±27.26   | 91.77±195.47    | 0.016753 | 0.017006 | 0.94531  | 1.4         | 0.011024 | 2           |
| 3-Methyl-2-Oxovaleric acid (OMV) | 11.23    | 89             | 1.53±0.65     | 1.25±0.52       | 0.009959 | 0.011706 | 0.14844  | 0.7         | 0.042608 | 0.8         |
| 3-Hydroxyisovaleric acid (HMB)   | 12.07    | 131            | 0.70±0.49     | 1.28±0.81       | 1.15E-06 | 9.66E-06 | 0.007813 | 1.8         | 1.77E-05 | 1.8         |
| Urea                             | 13.23    | 189            | 780.33±338.31 | 1,227.54±642.70 | 0.000148 | 0.00038  | 0.14844  | 1.3         | 0.000381 | 1.5         |
| Ethanolamine (ETA)               | 13.67    | 174            | 5.23±2.14     | 3.81±1.09       | 0.000148 | 0.00038  | 0.64063  | 0.9         | 0.000153 | 0.7         |
| Leucine                          | 14.34    | 158            | 43.59±12.73   | 77.49±67.44     | 0.002339 | 0.003483 | 0.015625 | 1.5         | 0.024749 | 1.4         |
| Glycerol                         | 13.97    | 205            | 33.38±35.55   | 50.23±42.64     | 0.016753 | 0.017006 | 0.3125   | 1.6         | 0.031709 | 1.6         |
| Succinate                        | 15.08    | 147            | 1.14±0.44     | 0.79±0.23       | 9.96E-05 | 0.000303 | 0.14844  | 0.8         | 0.000342 | 0.7         |
| Threonine                        | 16.95    | 218            | 18.19±11.42   | 27.04±14.98     | 0.016004 | 0.017006 | 0.25     | 1.6         | 0.029833 | 1.4         |
| Malate                           | 19.61    | 233            | 0.18±0.16     | 0.11±0.06       | 0.000186 | 0.000429 | 0.38281  | 0.9         | 0.000244 | 0.6         |
| 4-Hydroxy-L-proline (Hyp)        | 20.49    | 230            | 4.77±3.32     | 2.19±1.13       | 7.11E-07 | 9.53E-06 | 0.64063  | 0.9         | 1.04E-07 | 0.4         |
| Benzoate                         | 13.17    | 179            | 0.04±0.03     | 0.03±0.01       | 0.000991 | 0.001747 | 0.039063 | 0.8         | 0.012704 | 0.8         |
| Hypotaurine                      | 22.16    | 188            | 0.79±0.57     | 0.49±0.24       | 6.09E-05 | 0.000204 | 0.25     | 0.8         | 7.20E-05 | 0.7         |
| Glutamate                        | 22.78    | 246            | 30.04±20.95   | 20.21±9.34      | 0.009481 | 0.011343 | 0.3125   | 0.9         | 0.017887 | 0.7         |
| Phenylalanine                    | 22.81    | 218            | 44.85±19.81   | 32.92±12.40     | 0.000386 | 0.000783 | 0.078125 | 0.8         | 0.002234 | 0.7         |
| Hypoxanthine                     | 26.79    | 265            | 3.41±4.15     | 1.91±3.46       | 0.000186 | 0.000429 | 0.039063 | 0.5         | 0.002662 | 0.5         |
| Citrate                          | 27.13    | 273            | 3.84±1.91     | 2.62±1.22       | 0.00051  | 0.000976 | 0.10938  | 0.8         | 0.002902 | 0.7         |
| 1,5-Anhydroglucitol (AG)         | 27.76    | 217            | 31.63±17.41   | 18.46±12.95     | 2.21E-07 | 4.93E-06 | 0.015625 | 0.4         | 1.77E-05 | 0.6         |
| D-Galactose (GAL)                | 28.47    | 319            | 18.61±13.69   | 23.80±8.69      | 0.002339 | 0.003483 | 0.94531  | 1           | 0.000875 | 1.5         |

| Metabolites                   | Rt (min) | Peak Ion (m/z) | Pre-TBI     | After-TBI   | p value  | FDR      | Female   |             | Male     |             |
|-------------------------------|----------|----------------|-------------|-------------|----------|----------|----------|-------------|----------|-------------|
|                               |          |                |             |             |          |          | p value  | Fold Change | p value  | Fold change |
| Lysine                        | 29.23    | 174            | 54.66±19.23 | 86.19±45.85 | 1.76E-05 | 9.09E-05 | 0.3125   | 1.5         | 3.66E-05 | 1.5         |
| Mannitol                      | 29.30    | 319            | 2.20±5.68   | 5.35±9.81   | 0.000117 | 0.00034  | 0.38281  | 1.8         | 0.000106 | 2.4         |
| gluconate                     | 30.67    | 333            | 1.75±6.64   | 4.37±4.88   | 5.42E-06 | 3.63E-05 | 1        | 1.1         | 1.51E-05 | 9.2         |
| Indole-3-propionic acid (IPA) | 32.22    | 202            | 0.34±1.30   | 0.22±1.05   | 1.02E-06 | 9.66E-06 | 0.007813 | 0.4         | 0.000106 | 0.4         |
| Myoinositol                   | 32.37    | 305            | 11.56±6.24  | 7.32±3.46   | 1.33E-05 | 7.41E-05 | 0.054688 | 0.6         | 0.000244 | 0.7         |
| Urate                         | 32.65    | 441            | 28.63±21.61 | 8.48±9.99   | 3.77E-07 | 6.31E-06 | 0.007813 | 0.3         | 4.77E-06 | 0.2         |
| Indolelactate                 | 33.87    | 202            | 0.37±0.35   | 0.28±0.21   | 0.007009 | 0.008697 | 0.078125 | 0.7         | 0.040214 | 0.8         |

Note: For pseudotargeted GC-MS metabolic profiling, data was acquired with selected ion monitoring (SIM) mode.

**Table S3** The statistical information of significantly differential metabolites based on pseudotargeted LC–MS method

| Metabolites                              | Ion adducts        | Rt (min) | Precursor Ion (m/z) | Product Ion(m/z) | CE (eV) | Pre-TBI      | After-TBI     | p value  | FDR      | Female   |             | Male     |             |
|------------------------------------------|--------------------|----------|---------------------|------------------|---------|--------------|---------------|----------|----------|----------|-------------|----------|-------------|
|                                          |                    |          |                     |                  |         |              |               |          |          | p value  | Fold Change | p value  | Fold change |
| FFA(18:2)                                | [M-H] <sup>-</sup> | 14.82    | 279.2               | 279.2            | 22      | 8.89±6.41    | 15.05±14.28   | 0.01152  | 0.013082 | 0.38281  | 1.3         | 0.019113 | 1.6         |
| FFA(18:1)                                | [M-H] <sup>-</sup> | 15.91    | 281.2               | 281.2            | 22      | 0.63±0.46    | 1.06±1.01     | 0.01152  | 0.013082 | 0.38281  | 1.3         | 0.019113 | 1.6         |
| FFA18:3                                  | [M-H] <sup>-</sup> | 13.74    | 277.2               | 277.2            | 22      | 1.77±1.66    | 5.49±11.71    | 0.001199 | 0.002061 | 0.007813 | 4.8         | 0.045118 | 1.7         |
| Deoxycholic acid (DCA)                   | [M-H] <sup>-</sup> | 14.44    | 391.3               | 343.3            | 37      | 0.02±0.03    | 0.01±0.00     | 0.004598 | 0.006161 | 0.054688 | 0.6         | 0.042608 | 0.8         |
| Glycodeoxycholic acid (GDCA)             | [M-H] <sup>-</sup> | 12.79    | 448.3               | 74.1             | 38      | 0.014±0.02   | 0.007±0.01    | 0.006321 | 0.008145 | 0.10938  | 0.4         | 0.035754 | 0.5         |
| Tryptophan                               | [M-H] <sup>-</sup> | 4.51     | 202.9               | 116.1            | 21      | 0.11±0.04    | 0.15±0.08     | 0.006658 | 0.008416 | 0.46094  | 1           | 0.006549 | 1.4         |
| Glycochenodeoxycholate-3-sulfate (GCDCS) | [M-H] <sup>-</sup> | 12.60    | 528.2               | 448.2            | 38      | 0.14±0.18    | 0.05±0.04     | 0.000359 | 0.000753 | 0.078125 | 0.4         | 0.002662 | 0.4         |
| Aspartate                                | [M+H] <sup>+</sup> | 9.16     | 134.2               | 74.1             | 13      | 0.02±0.01    | 0.01±0.01     | 0.005399 | 0.007093 | 0.3125   | 0.6         | 0.013624 | 0.8         |
| Acetylcholine                            | [M+H] <sup>+</sup> | 8.73     | 146.1               | 87.1             | 13      | 0.48±0.20    | 0.64±0.31     | 0.004123 | 0.005638 | 0.10938  | 1.6         | 0.02805  | 1.2         |
| Glutamine                                | [M+H] <sup>+</sup> | 0.81     | 147.1               | 84.1             | 16      | 0.39±0.12    | 0.57±0.24     | 0.000233 | 0.000519 | 0.039063 | 1.4         | 0.003161 | 1.4         |
| Carnitine C3(AC3)                        | [M+H] <sup>+</sup> | 1.16     | 218.2               | 85.1             | 20      | 54.50±34.70  | 98.84±79.05   | 0.013288 | 0.014595 | 0.3125   | 2           | 0.026357 | 1.5         |
| Creatinine                               | [M+H] <sup>+</sup> | 0.80     | 114.1               | 44.0             | 17      | 0.83±0.22    | 1.08±0.40     | 2.79E-05 | 9.83E-05 | 0.10938  | 1.1         | 0.000172 | 1.3         |
| Ornithine                                | [M+H] <sup>+</sup> | 1.14     | 133.1               | 70.0             | 12      | 0.10±0.03    | 0.07±0.02     | 6.66E-06 | 4.05E-05 | 0.007813 | 0.5         | 0.000716 | 0.7         |
| Daidzein                                 | [M+H] <sup>+</sup> | 4.41     | 255.2               | 199.1            | 24      | 0.02±0.01    | 0.03±0.01     | 2.79E-05 | 9.83E-05 | 0.039063 | 1.5         | 0.000473 | 1.5         |
| Carnitine C4(AC4)                        | [M+H] <sup>+</sup> | 2.02     | 232.1               | 85.0             | 19      | 48.42±30.44  | 155.61±150.29 | 1.94E-05 | 9.27E-05 | 0.015625 | 4.1         | 0.000425 | 2.1         |
| Carnitine C18:1(AC18:1)                  | [M+H] <sup>+</sup> | 17.10    | 426.2               | 85.0             | 29      | 162.13±73.41 | 116.61±52.11  | 0.009023 | 0.010992 | 0.38281  | 1.1         | 0.000792 | 0.6         |
| LPE16:0                                  | [M+H] <sup>+</sup> | 9.90     | 454.3               | 313.2            | 22      | 6.99±3.89    | 12.72±7.78    | 2.33E-05 | 9.74E-05 | 0.039063 | 2           | 0.000583 | 1.7         |
| LPE18:0                                  | [M+H] <sup>+</sup> | 11.20    | 482.3               | 341.2            | 22      | 7.50±4.44    | 14.18±9.27    | 2.86E-06 | 2.13E-05 | 0.007813 | 1.9         | 0.000153 | 1.8         |
| LPC16:0                                  | [M+H] <sup>+</sup> | 9.80     | 496.3               | 184.1            | 27      | 1.54±0.28    | 1.72±0.35     | 0.003692 | 0.005378 | 0.38281  | 1.1         | 0.007629 | 1.1         |
| LPC18:1                                  | [M+H] <sup>+</sup> | 10.21    | 522.3               | 184.1            | 23      | 0.77±0.18    | 0.91±0.26     | 0.003902 | 0.005563 | 0.46094  | 1.1         | 0.006549 | 1.2         |
| LPE22:6                                  | [M+H] <sup>+</sup> | 9.62     | 526.3               | 385.3            | 18      | 1.59±1.08    | 2.77±1.79     | 0.000764 | 0.001383 | 0.007813 | 2.5         | 0.026357 | 1.7         |

|                   |                    |       |       |       |    |               |               |          |          |          |     |          |     |
|-------------------|--------------------|-------|-------|-------|----|---------------|---------------|----------|----------|----------|-----|----------|-----|
| Arginine          | [M+H] <sup>+</sup> | 0.68  | 175.1 | 70.0  | 21 | 1.48±0.47     | 2.26±1.41     | 0.002206 | 0.003437 | 0.039063 | 1.5 | 0.017887 | 1.3 |
| PC32:0            | [M+H] <sup>+</sup> | 16.66 | 734.6 | 184.1 | 30 | 0.80±0.14     | 0.76±0.11     | 0.016753 | 0.017006 | 0.14844  | 0.9 | 0.06624  | 1   |
| PC34:2            | [M+H] <sup>+</sup> | 16.65 | 785.6 | 184.1 | 22 | 8.98±1.66     | 7.77±1.34     | 7.81E-05 | 0.000249 | 0.023438 | 0.9 | 0.001065 | 0.9 |
| PC34:1            | [M+H] <sup>+</sup> | 16.81 | 760.6 | 184.1 | 22 | 7.30±0.33     | 7.61±0.57     | 0.001538 | 0.002576 | 0.54688  | 1   | 0.001867 | 1   |
| PC(O-36:2)        | [M+H] <sup>+</sup> | 16.86 | 772.6 | 184.1 | 30 | 0.37±0.15     | 0.31±0.10     | 0.001959 | 0.003202 | 0.015625 | 0.8 | 0.026357 | 0.9 |
| PC36:4            | [M+H] <sup>+</sup> | 16.75 | 782.6 | 184.1 | 30 | 8.41±1.60     | 6.65±1.43     | 2.12E-05 | 9.48E-05 | 0.015625 | 0.7 | 0.001172 | 0.8 |
| PC36:2            | [M+H] <sup>+</sup> | 16.91 | 786.6 | 184.1 | 30 | 11.22±2.76    | 9.87±2.01     | 0.004123 | 0.005638 | 0.039063 | 0.9 | 0.031709 | 0.9 |
| Carnitine C2(AC2) | [M+H] <sup>+</sup> | 0.87  | 204.1 | 85.0  | 15 | 583.49±354.45 | 820.19±397.52 | 0.012085 | 0.013495 | 0.007813 | 2.7 | 0.14377  | 1.2 |
| PC(O-38:5)        | [M+H] <sup>+</sup> | 16.68 | 794.6 | 184.1 | 42 | 0.07±0.02     | 0.04±0.01     | 3.11E-08 | 1.04E-06 | 0.007813 | 0.5 | 6.74E-06 | 0.6 |
| PC38:6            | [M+H] <sup>+</sup> | 16.35 | 806.5 | 184.1 | 30 | 0.11±0.03     | 0.07±0.02     | 3.20E-09 | 2.15E-07 | 0.007813 | 0.5 | 5.22E-07 | 0.6 |
| PC38:4            | [M+H] <sup>+</sup> | 16.45 | 810.5 | 184.1 | 30 | 0.22±0.07     | 0.16±0.06     | 0.000764 | 0.001383 | 0.10938  | 0.6 | 0.004778 | 0.7 |
| PC40:6            | [M+H] <sup>+</sup> | 17.07 | 834.6 | 184.1 | 45 | 0.24±0.07     | 0.16±0.06     | 1.02E-06 | 9.66E-06 | 0.078125 | 0.6 | 4.77E-06 | 0.6 |
| PE38:4            | [M+H] <sup>+</sup> | 16.40 | 768.6 | 627.5 | 22 | 0.69±0.63     | 1.82±2.17     | 0.000335 | 0.000723 | 0.3125   | 2   | 0.000526 | 2.7 |
| PE40:6            | [M+H] <sup>+</sup> | 17.02 | 792.6 | 186.5 | 22 | 3.22±2.77     | 5.70±4.29     | 0.002206 | 0.003437 | 0.25     | 1.6 | 0.008225 | 1.7 |
| Hippurate         | [M-H] <sup>-</sup> | 5.51  | 178.1 | 134.1 | 18 | 9.71±1.79     | 12.29±2.38    | 2.79E-05 | 9.83E-05 | 0.10938  | 1.1 | 0.000153 | 1.3 |

**Note:** ① For pseudotargeted LC-MS metabolic profiling, data was acquired with selected reaction monitoring (SRM) mode; ② PC , PC-O, LPC, PE , LPE and FFA represent phosphatidylcholines, alkyl and ether-linked substituent PCs, lyso-phosphatidylcholines, phosphatidylethanolamines , lyso-phosphatidylethanolamines and free fatty acids; ③ For paired analysis, FCs are calculated by computing the ratio between paired samples, (i.e. one FC per pair), and then compute their means (i.e. pair means).

Table S4 Statistical results of the linear stepwise regression method

| Feature variable | Coefficient | Significance | VIF   |
|------------------|-------------|--------------|-------|
| (Constant)       | 2.296       | .000         | -     |
| PC(O-38:5)       | -3.781      | .002         | 1.830 |
| Urate            | -.004       | .003         | 1.596 |
| Ornithine        | -5.178      | .000         | 1.298 |
| Hippurate        | .082        | .000         | 2.094 |
| Aspartate        | -18.049     | .000         | 1.117 |
| AG               | -.009       | .000         | 1.688 |
| GCDCS            | -.818       | .000         | 1.372 |
| PC40:6           | -1.554      | .000         | 1.784 |
| Hypoxanthine     | .024        | .001         | 1.530 |
| Acetylcholine    | -.298       | .008         | 1.821 |

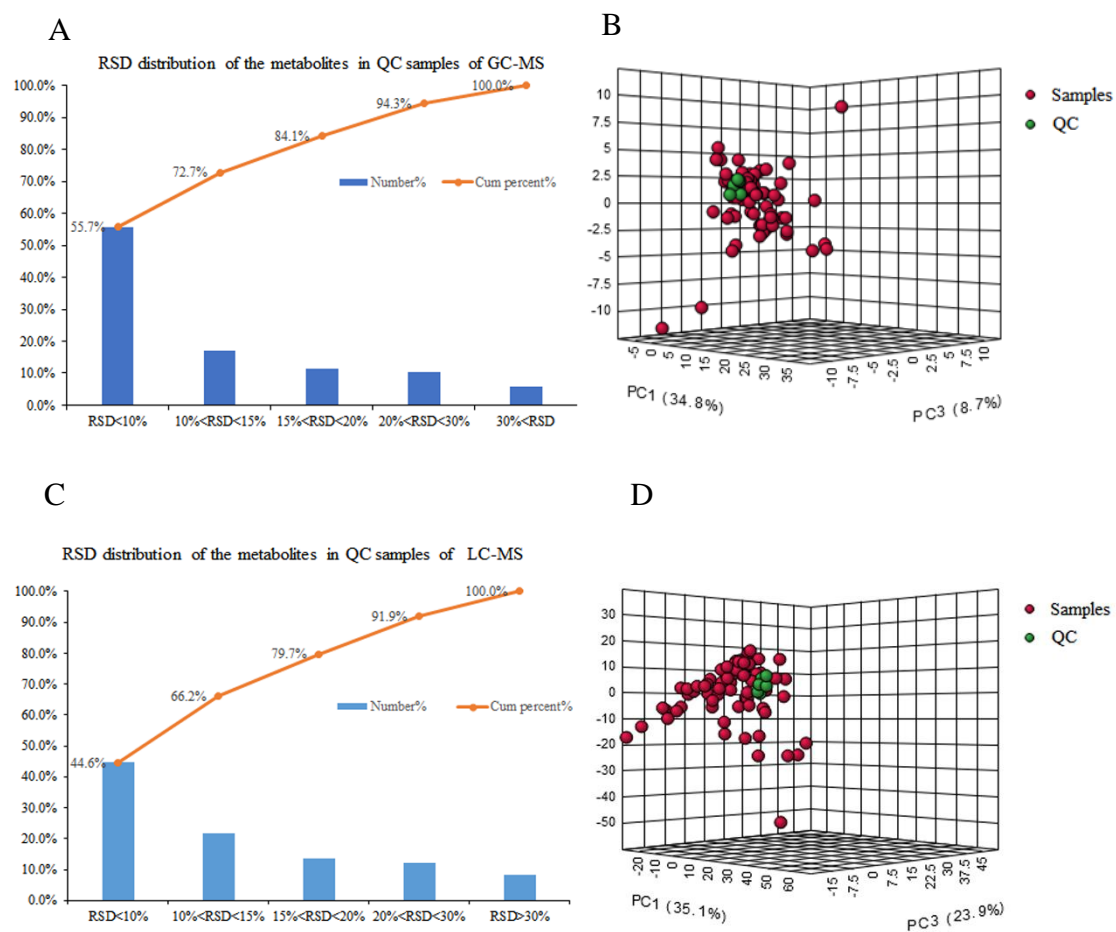

**Fig.S1** RSD distributions of the metabolites in QC samples (A, C) and PCA score plots (B, D) of the sample distributions in GC-MS and LC-MS

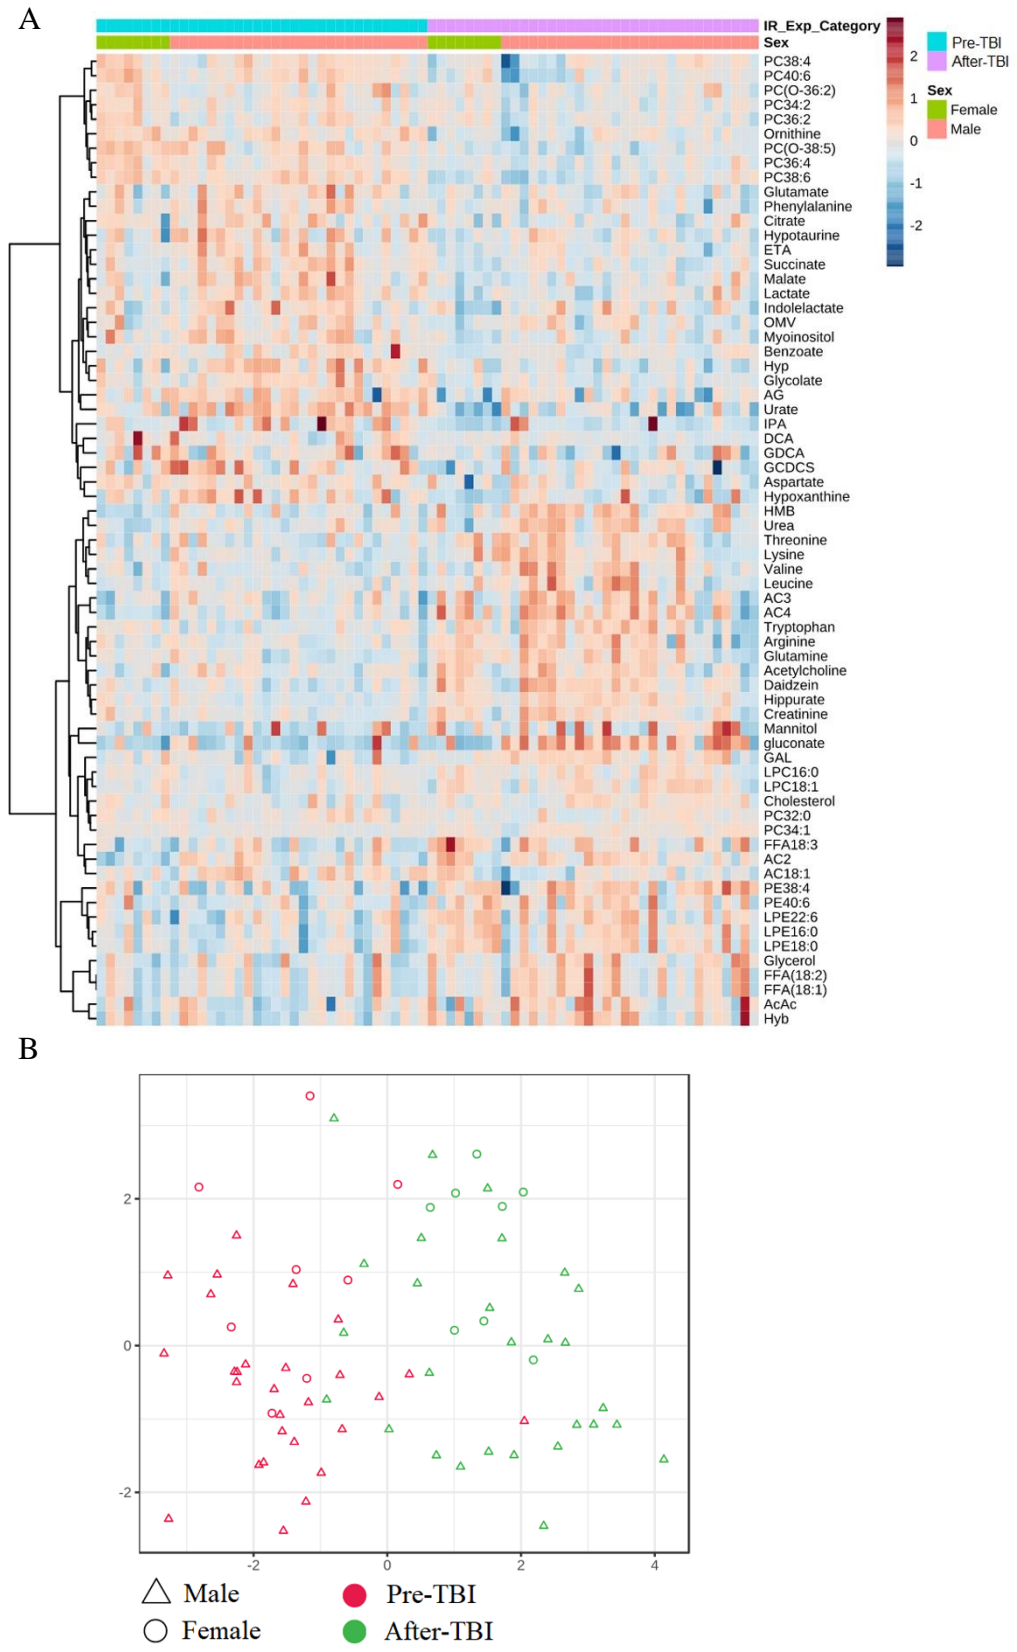

**Fig.S2** Sex-dependent plasma metabolic pattern changes between Pre-TBI and After-TBI groups based on a heatmap (A) and a PCA plot (B).



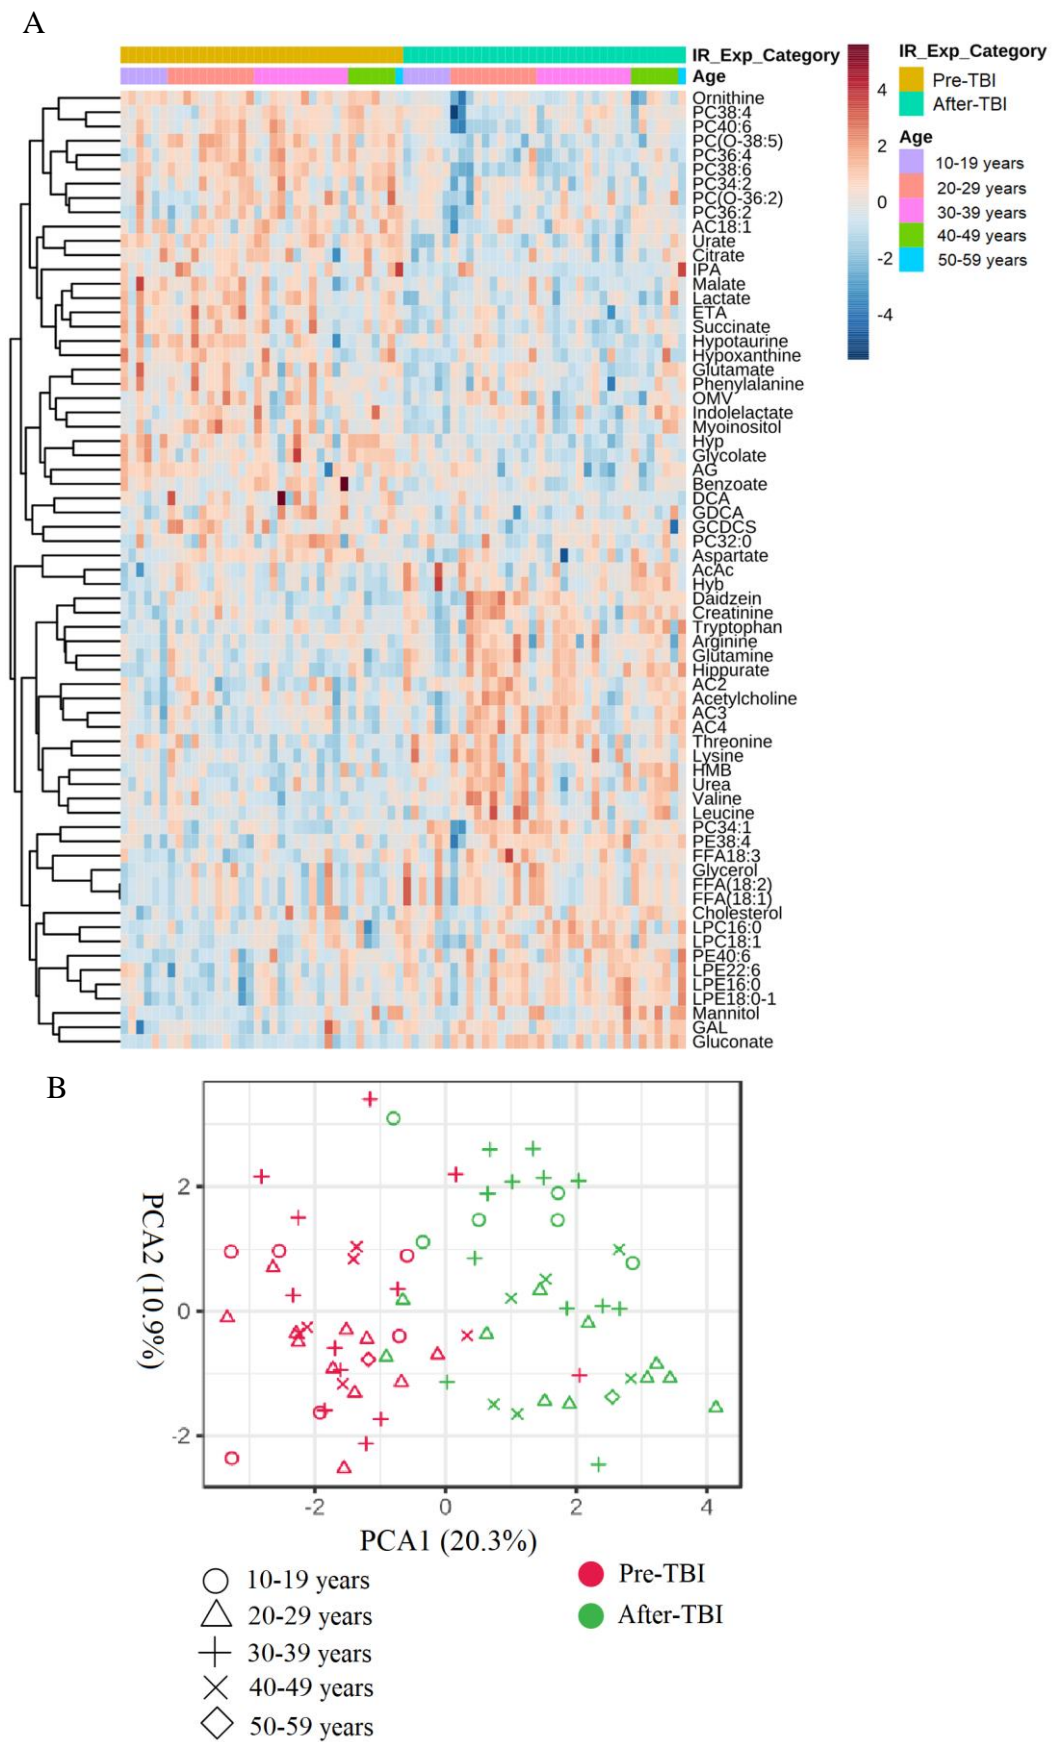

**Fig.S3** Effect of age on plasma metabolic pattern changes in Pre-TBI and After-TBI groups based on a heatmap (A) and a PCA plot (B)

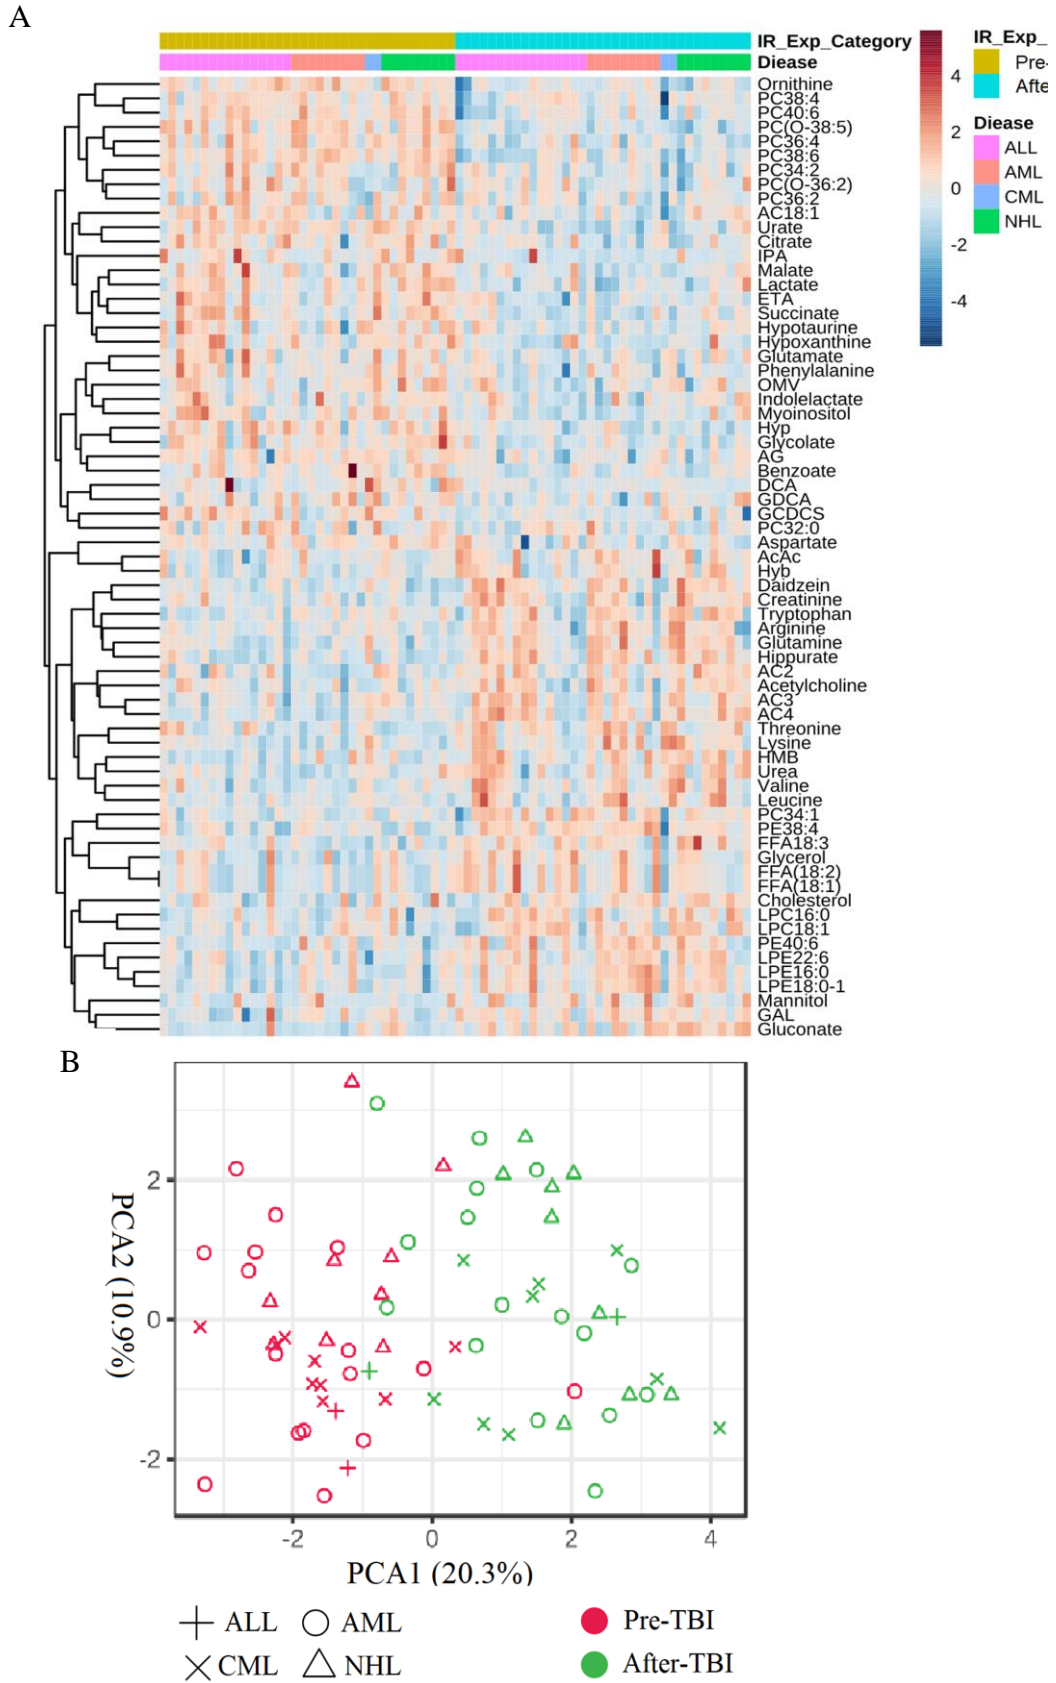

**Fig.S4** Effect of disease type on plasma metabolic pattern changes in Pre-TBI and After-TBI groups based on a heatmap (A) and a PCA plot (B)

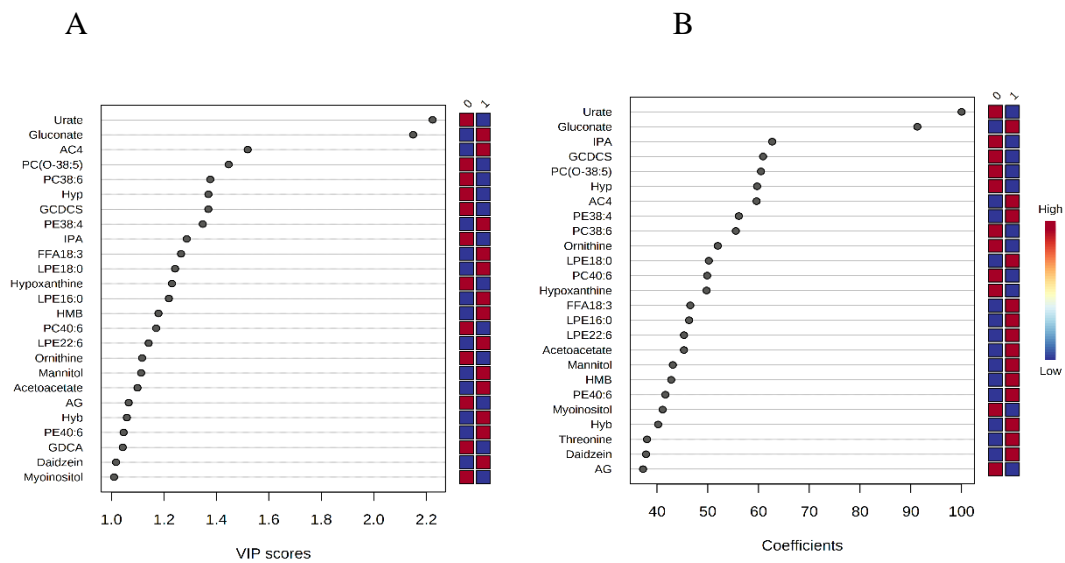

**Fig.S5** The heatmap of VIP scores(A) and coefficients(B) from metabolites responsible for the separation observed in the PLS-DA model.
